# Supplementary material
Source: HighWire-hosted journal article supplement (https://ajnr-sso.highwirestaging.com/highwire/filestream/101739/field_highwire_adjunct_files/0/0890.pdf)
Supplement: 0890.pdf [file 0890.pdf]

## **SUPPLEMENTAL MATERIAL**

### **Outcomes with Endovascular Treatment of patients with M2 segment Middle Cerebral Artery Occlusion in The Late Time Window**

STROBE checklist

Supplemental table I-III

STROBE Statement—Checklist of items that should be included in reports of *cohort studies*

|                              | Item No | Recommendation                                                                                                                                                                                                                                                                                                                         | Page No |
|------------------------------|---------|----------------------------------------------------------------------------------------------------------------------------------------------------------------------------------------------------------------------------------------------------------------------------------------------------------------------------------------|---------|
| <b>Title and abstract</b>    | 1       | (a) Indicate the study's design with a commonly used term in the title or the abstract                                                                                                                                                                                                                                                 | 1       |
|                              |         | (b) Provide in the abstract an informative and balanced summary of what was done and what was found                                                                                                                                                                                                                                    | 1       |
| <b>Introduction</b>          |         |                                                                                                                                                                                                                                                                                                                                        |         |
| Background/rationale         | 2       | Explain the scientific background and rationale for the investigation being reported                                                                                                                                                                                                                                                   | 3       |
| Objectives                   | 3       | State specific objectives, including any prespecified hypotheses                                                                                                                                                                                                                                                                       | 3       |
| <b>Methods</b>               |         |                                                                                                                                                                                                                                                                                                                                        |         |
| Study design                 | 4       | Present key elements of study design early in the paper                                                                                                                                                                                                                                                                                | 4       |
| Setting                      | 5       | Describe the setting, locations, and relevant dates, including periods of recruitment, exposure, follow-up, and data collection                                                                                                                                                                                                        | 4       |
| Participants                 | 6       | (a) Give the eligibility criteria, and the sources and methods of selection of participants. Describe methods of follow-up<br><br>(b) For matched studies, give matching criteria and number of exposed and unexposed                                                                                                                  | 4       |
| Variables                    | 7       | Clearly define all outcomes, exposures, predictors, potential confounders, and effect modifiers. Give diagnostic criteria, if applicable                                                                                                                                                                                               | 4-5     |
| Data sources/<br>measurement | 8*      | For each variable of interest, give sources of data and details of methods of assessment (measurement). Describe comparability of assessment methods if there is more than one group                                                                                                                                                   | 4-5     |
| Bias                         | 9       | Describe any efforts to address potential sources of bias                                                                                                                                                                                                                                                                              | 5       |
| Study size                   | 10      | Explain how the study size was arrived at                                                                                                                                                                                                                                                                                              | NA      |
| Quantitative variables       | 11      | Explain how quantitative variables were handled in the analyses. If applicable, describe which groupings were chosen and why                                                                                                                                                                                                           | 5       |
| Statistical methods          | 12      | (a) Describe all statistical methods, including those used to control for confounding<br><br>(b) Describe any methods used to examine subgroups and interactions<br><br>(c) Explain how missing data were addressed<br><br>(d) If applicable, explain how loss to follow-up was addressed<br><br>(e) Describe any sensitivity analyses | 5       |

|                  |     |                                                                                                                                                                                                                                                                                                         |  |     |
|------------------|-----|---------------------------------------------------------------------------------------------------------------------------------------------------------------------------------------------------------------------------------------------------------------------------------------------------------|--|-----|
| <b>Results</b>   |     |                                                                                                                                                                                                                                                                                                         |  |     |
| Participants     | 13* | (a) Report numbers of individuals at each stage of study—eg numbers potentially eligible, examined for eligibility, confirmed eligible, included in the study, completing follow-up, and analysed<br><br>(b) Give reasons for non-participation at each stage<br><br>(c) Consider use of a flow diagram |  | 6   |
| Descriptive data | 14* | (a) Give characteristics of study participants (eg demographic, clinical, social) and information on exposures and potential confounders<br><br>(b) Indicate number of participants with missing data for each variable of interest<br><br>(c) Summarise follow-up time (eg, average and total amount)  |  | 6-7 |
| Outcome data     | 15* | Report numbers of outcome events or summary measures over time                                                                                                                                                                                                                                          |  | 6-7 |

**Supplement Table I.** Characteristics of included studies

| Study                                | Italian Registry                               | Prove-It                                                      | ESCAPE/ ESCAPE-NA1                                                                 | Beaumont Hospital Registry             | Acute STroke Registry and Analysis of Lausanne (ASTRAL) | SNUBH                                                             | Stroke registry of Turku University Hospital                      |
|--------------------------------------|------------------------------------------------|---------------------------------------------------------------|------------------------------------------------------------------------------------|----------------------------------------|---------------------------------------------------------|-------------------------------------------------------------------|-------------------------------------------------------------------|
| Type of study                        | Multicenter cohort                             | Multicenter cohort                                            | Randomized controlled trial                                                        | Monocenter cohort                      | Monocenter cohort                                       | Multicenter cohort                                                | Monocenter cohort                                                 |
| <i>Population</i>                    |                                                |                                                               |                                                                                    |                                        |                                                         |                                                                   |                                                                   |
| Country                              | Italy                                          | North America, Europe, East Asia                              | North America, Europe, East Asia                                                   | Dublin, Ireland                        | Lausanne, Switzerland                                   | Korea                                                             | Finland                                                           |
| Sample size                          | 139                                            | 24                                                            | ESCAPE: 18<br>ESCAPE -NA1(control arm): 74                                         | 141                                    | 35                                                      | 18                                                                | 12                                                                |
| Wake-up vs Witnessed                 | Available                                      | Available                                                     | Available                                                                          | Available                              | Available                                               | Available                                                         | Available                                                         |
| Inclusion                            | Onset to imaging>360 minutes                   | Onset to imaging>360 minutes                                  | Onset to imaging>360 minutes                                                       | Onset to imaging>360 minutes           | Onset to imaging>360 minutes                            | Onset to imaging>360 minutes                                      | Onset to imaging>360 minutes                                      |
| <b>Imaging Criteria Availability</b> |                                                |                                                               |                                                                                    |                                        |                                                         |                                                                   |                                                                   |
| NCCT ASPECTS                         | All patients                                   | All patients                                                  | All patients                                                                       | All patients                           | All patients                                            | All patients                                                      | All patients                                                      |
| Collateral assessment modality       | sCTA in 87<br>mCTA in 52                       | mCTA in all                                                   | ESCAPE: all mCTA<br>ESCAPE -NA1: sCTA: 18, mCTA: 56                                | sCTA in 14<br>mCTA in 127              | sCTA in all                                             | mCTA in all                                                       | sCTA in all                                                       |
| Collateral scoring                   | <u>sCTA</u> : 4-point scale poor (scores, 0–1) | moderate–good collateral grade defined as ≥50% filling of the | ESCAPE: 10-point scale. Moderate–good collateral grade was defined as ≥50% filling | moderate–good collateral grade defined | Graded based on the Tan score.                          | moderate–good collateral grade defined as ≥50% filling of the MCA | moderate–good collateral grade defined as ≥50% filling of the MCA |

|                        |                                                                                                                             |                                        |                                                                                 |                                                      |                                                                                                                                                                                                                              |                                         |                                 |
|------------------------|-----------------------------------------------------------------------------------------------------------------------------|----------------------------------------|---------------------------------------------------------------------------------|------------------------------------------------------|------------------------------------------------------------------------------------------------------------------------------------------------------------------------------------------------------------------------------|-----------------------------------------|---------------------------------|
|                        | and good (scores, 2–3),<br><br><u>mCTA</u> : 6-point scale<br>poor (grade, 0–3) and good (scores, 4–5)                      | MCA pial arterial circulation          | of the MCA pial arterial circulation<br><br>ESCAPE-NA1: good, moderate, or poor | as ≥50% filling of the MCA pial arterial circulation | 0=absent; 1=filling <50% of the occluded territory; 2=filling 50%-99% of the occluded territory; 3=filling 100% of the occluded territory; 4=exuberant filling; 5=not applicable (no prox. Occlusion)<br><br>Good = Score >1 | pial arterial circulation               | pial arterial circulation       |
| <b>Occlusion Site</b>  | ICA M1 M2 (tandem occlusion specified)                                                                                      | ICA M1 M2 (tandem occlusion specified) | ICA M1 M2 (tandem occlusion specified)                                          | ICA M1 M2 (tandem occlusion specified)               | ICA M1 M2 (tandem occlusion specified)                                                                                                                                                                                       | ICA M1 M2 (tandem occlusion specified)  | M2 (tandem occlusion specified) |
| <b>CTP assessment</b>  | All patients<br><br>Mismatch (Y/N): core ≤50% of hypoperfusion extent or < 33% of the MCA territory according to Turk et al | 21                                     | ESCAPE: 18<br>ESCAPE-NA1: 40                                                    | 37                                                   | 29                                                                                                                                                                                                                           | 18                                      | 4                               |
| <b>Core definition</b> | CBV <2.0 mL/100 g                                                                                                           |                                        | relative CBF threshold volume, defined as Tmax>12.5                             | N/A                                                  | CBV <2.0 mL/100 g                                                                                                                                                                                                            | rCBF <30% compared to the contralateral | N/A                             |

|                                         |                                                                            |                                                     |                                                  |              |                                           |                                                      |             |
|-----------------------------------------|----------------------------------------------------------------------------|-----------------------------------------------------|--------------------------------------------------|--------------|-------------------------------------------|------------------------------------------------------|-------------|
|                                         |                                                                            | relative CBF threshold volume, defined as Tmax>12.5 |                                                  |              |                                           | hemisphere (RAPID)<br>rCBV <30% and DT >2 sec (OLEA) |             |
| <b>Penumbra definition</b>              | MTT >145% of the contralateral side value                                  | Tmax>9                                              | Tmax>9                                           | N/A          | MTT >145% of the contralateral side value | Tmax >6 sec (both RAPID and OLEA)                    | N/A         |
| <b>Clinical Criteria</b>                |                                                                            |                                                     |                                                  |              |                                           |                                                      |             |
| <b>Age</b>                              | All patients                                                               |                                                     |                                                  |              |                                           |                                                      |             |
| <b>Baseline Stroke Severity (NIHSS)</b> | All patients                                                               |                                                     |                                                  |              |                                           |                                                      |             |
| <b>Time metrics</b>                     | Onset to: presentation, to imaging, to puncture, to reperfusion (all)      |                                                     |                                                  |              |                                           |                                                      |             |
| <b>Intravenous Alteplase</b>            | 0 patient                                                                  | 0 patient                                           | ESCAPE: 4 patients<br>ESCAPE-NA1: 10 patients    | 10 patients  | 17 patients                               | 0 patient                                            | 5 patients  |
| <b>Reperfusion</b>                      | 2b-3 vs not                                                                | 2b-3 vs not                                         | ESCAPE: mTICI scores<br>ESCAPE-NA1: eTICI scores | eTICI scores | mTICI scores                              | 2b-3 vs not                                          | 2b-3 vs not |
| <b>Outcomes</b>                         | Symptomatic intracranial hemorrhage (binary) and 90-day mRS scores for all |                                                     |                                                  |              |                                           |                                                      |             |

1. Prove-IT clinical study (ClinicalTrials.gov Identifier: NCT02184936)
2. ESCAPE randomized controlled trial (ClinicalTrials.gov Identifier: NCT01778335)
3. ESCAPE NA1 randomized controlled trial (ClinicalTrials.gov Identifier: NCT02930018)

**Supplement Table II.** Baseline demographics and outcomes in patients with M2 occlusion stratified by whether they achieved successful reperfusion (eTICI 2b-3).

| Characteristic                    | Final eTICI <2b (n=16) | Final eTICI ≥2b (n=78) | P value     |
|-----------------------------------|------------------------|------------------------|-------------|
| Age, year                         | 76 (69-81)             | 74 (60-82)             | 0.58        |
| Female sex                        | 8 (50.0)               | 43 (55.1)              | 0.78        |
| <b>Stroke presentation</b>        |                        |                        |             |
| Wakeup stroke                     | 5 (33.3)               | 44 (56.4)              | 0.16        |
| Baseline NIHSS                    | 18 (9-20)              | 10 (7-15)              | 0.05        |
| Tandem cervical occlusion         | 2 (12.5)               | 8 (10.3)               | 0.68        |
| IV Alteplase                      | 3 (18.7)               | 9 (11.5)               | 0.42        |
| <b>Time metrics, minutes</b>      |                        |                        |             |
| Time from onset to ED door        | 397 (350-645)          | 590 (395-738)          | 0.06        |
| Time from onset to CT scan        | 450 (398-679)          | 608 (608-750)          | 0.09        |
| Time from onset to puncture       | 530 (445- 787)         | 720 (514- 900)         | 0.11        |
| Time from onset to reperfusion    | 540 (511- 663)         | 762 (586-968)          | <b>0.03</b> |
| Time from ED door to CT scan      | 32 (21-40)             | 26 (15-40)             | 0.29        |
| Time from CT to puncture          | 60 (43-118)            | 75 (36-112)            | 0.92        |
| Time from ED door to puncture     | 105 (89-150)           | 93 (62-131)            | 0.31        |
| Time from puncture to reperfusion | 55 (45-94)             | 39 (26-60)             | <b>0.03</b> |
| Time from ED door to reperfusion  | 183 (135-209)          | 139 (106-185)          | 0.08        |
| <b>Imaging factors</b>            |                        |                        |             |
| ASPECTS                           | 8 (7-9)                | 10 (8-10)              | <b>0.01</b> |

ASPECTS: Alberta Stroke Program Early CT Score, CTA: computed tomography angiography, ED: emergency department, ICA: internal carotid artery, MCA: middle cerebral artery, NIHSS: National Institutes of Health Stroke Scale.

Values are expressed as median (interquartile range (IQR)) or n (%).

Significantly results are marked in bold.

**Supplement Table III. Univariable and multivariable logistic regressions for the prediction of functional independence (mRS 0-2) at 90 days in M2 occlusion patients.**

| Variable                       | Univariable analysis   |         | Multivariable analysis |         |
|--------------------------------|------------------------|---------|------------------------|---------|
|                                | Unadjusted OR (95% CI) | P value | Adjusted OR (95% CI)   | P value |
| Age                            | 0.93 (0.89- 0.97)      | 0.001   | 0.93 (0.87- 0.99)      | 0.03    |
| Female sex                     | 1.00 (0.43- 2.38)      | 0.99    | 0.80 (0.18- 3.45)      | 0.77    |
| Baseline NIHSS score           | 0.88 (0.82- 0.95)      | 0.003   | 0.88 (0.83- 0.93)      | 0.02    |
| Time from onset to reperfusion | 0.99 (0.98- 1.00)      | 0.052   | 0.99 (0.99- 1.00)      | 0.01    |
| Final TIC1 2b-3                | 3.20 (0.97- 10.52)     | 0.06    | 2.84 (1.11- 7.29)      | 0.03    |

NIHSS: National Institutes of Health Stroke Scale. aOR: adjusted odds ratio. mRS: modified Rankin scale, TIC1: Thrombolysis in cerebral infarction
